# Supplementary material for: Skill mix in Swiss primary care group practices - a nationwide online survey
Source: PubMed Central journal article supplement (PMC6398248; doi:10.1186/s12875-019-0926-7), 2019-03-04
Supplement: 12875_2019_926_MOESM1_ESM.pdf [file 12875_2019_926_MOESM1_ESM.pdf]

**Table S1** Questions of online questionnaire

| Question Nr | Questions                                                                                                                                       | Answer choices (simplified)                         | Conditions        |
|-------------|-------------------------------------------------------------------------------------------------------------------------------------------------|-----------------------------------------------------|-------------------|
| 1           | Is your practice part of practice network consisting of practices at different places?                                                          | Yes/No (Y/N)                                        | Mandatory for all |
| 2           | How many doctors do work in your practice?                                                                                                      | Number                                              | Mandatory for all |
| 3           | Are there medical practice assistants working in your practice who do patient counselling?                                                      | Y/N                                                 | Mandatory for all |
| 4           | How many of these practice assistants in such roles work in your practice?                                                                      | Number                                              | If Q3=Y           |
| 5           | Are there health professionals working in the practice?                                                                                         | Y/N                                                 | Mandatory for all |
| 6           | Which professional group do they belong to and how many are there per occupational group?                                                       | Numbers per profession                              | If Q5=Y           |
| 7           | How many health professionals work in the respective level of employment?                                                                       | Number sorted by profession and level of employment | If Q5=Y           |
| 8           | What is the total fulltime equivalent of all health professionals in your practice?                                                             | Number                                              | If Q5=Y           |
| 9           | How many health professionals have completed one of the following educational degrees?                                                          | Numbers sorted by profession and educational degree | If Q5=Y           |
| 10          | How many health professionals have completed one of the following further education qualifications?                                             | Numbers sorted by profession and qualifications     | If Q5=Y           |
| 11          | Are the health professionals practicing in advanced roles or with extended competencies?                                                        | Y/N                                                 | If Q5=Y           |
| 12          | Which specialisations did the continuing education courses, which the health professionals with advanced roles completed, have?                 | Text box                                            | If Q5=Y           |
| 13          | You have indicated that health professionals work in your practice. Would you be willing to be at our disposal for any further data collection? | Y/N                                                 | If Q5=Y           |
| 14          | Please enter below an email address and/or telephone number, where we can contact you.                                                          | Text box                                            | If Q5=Y           |
| 15          | Which medical specialties are offered in your practice?                                                                                         | List of all medical specialties                     | Mandatory for all |
| 16          | In which canton does your practice operate?                                                                                                     | List of all Swiss cantons                           | Mandatory for all |
