# Supplementary material for: Skill mix in Swiss primary care group practices - a nationwide online survey
Source: PubMed Central journal article supplement (PMC6398248; doi:10.1186/s12875-019-0926-7), 2019-03-04
Supplement: 12875_2019_926_MOESM2_ESM.pdf [file 12875_2019_926_MOESM2_ESM.pdf]

**Table S2** Medical specialties offered by the 102 participating group practices

| Medical specialties                                | N  | %    |
|----------------------------------------------------|----|------|
| Internal Medicine                                  | 93 | 91.2 |
| Gynecology and Obstetrics                          | 29 | 28.4 |
| Pediatric and adolescent medicine                  | 29 | 28.4 |
| Psychiatry and Psychotherapy                       | 24 | 23.5 |
| Cardiology                                         | 17 | 16.7 |
| Tropical and travel medicine                       | 16 | 15.7 |
| Dermatology                                        | 12 | 11.8 |
| Endocrinology/Diabetology                          | 12 | 11.8 |
| Orthopedic surgery and Traumatology                | 12 | 11.8 |
| Rheumatology                                       | 12 | 11.8 |
| Surgery                                            | 11 | 10.8 |
| Urology                                            | 11 | 10.8 |
| Pediatric and adolescent psychiatry and psychology | 9  | 8.8  |
| Ophthalmology                                      | 9  | 8.8  |
| Work Medicine                                      | 8  | 7.8  |
| Medical Oncology                                   | 8  | 7.8  |
| Radiology                                          | 8  | 7.8  |
| Pneumonology                                       | 7  | 6.9  |
| Prevention and healthcare                          | 7  | 6.9  |
| Allergiology                                       | 5  | 4.9  |
| Oto-Rhino-Laryngology                              | 5  | 4.9  |
| Hand Surgery                                       | 4  | 3.9  |
| Medical Genetics                                   | 4  | 3.9  |
| Angiology                                          | 3  | 2.9  |
| Hematology                                         | 3  | 2.9  |
| Cardiac and thoracic vascular surgery              | 3  | 2.9  |
| Infectiology                                       | 3  | 2.9  |
| Neurosurgery                                       | 3  | 2.9  |
| Neurology                                          | 3  | 2.9  |
| Pathology                                          | 3  | 2.9  |
| Plastic reconstructive and aesthetic surgery       | 3  | 2.9  |
| Anesthesiology                                     | 2  | 2    |
| Gastroenterology                                   | 2  | 2    |
| Vascular Surgery                                   | 2  | 2    |
| Pediatric Surgery                                  | 2  | 2    |
| Clinical Pharmacology and Toxicology               | 2  | 2    |
| Nephrology                                         | 2  | 2    |
| Pharmaceutic Medicine                              | 2  | 2    |
| Physical medicine and rehabilitation               | 2  | 2    |
| Forensic Medicine                                  | 2  | 2    |
| Oral and maxillofacial surgery                     | 1  | 1    |
| Thoracic Surgery                                   | 1  | 1    |
